# Supplementary material for: 深海熱水環境における非生物的な炭化水素合成 : 熱水実験による制約( 有機物・微生物・生態系の地球化学)
Source: Royal Society of Chemistry journal article supplement (doi:10.1039/c8ra03723j), 2010-12-25
Supplement: c8ra03723j1.pdf [file c8ra03723j1.pdf]

## **Supporting information**

### **Full-color Tunable Photoluminescent Carbon Dots Based on Oil/Water Interfacial Synthesis and Their Applications**

**Hongchong Guo, Bo You\*, Shuyan Zhao, Yihao Wang, Gang Sun, Yujie Bai, Lei Shi**

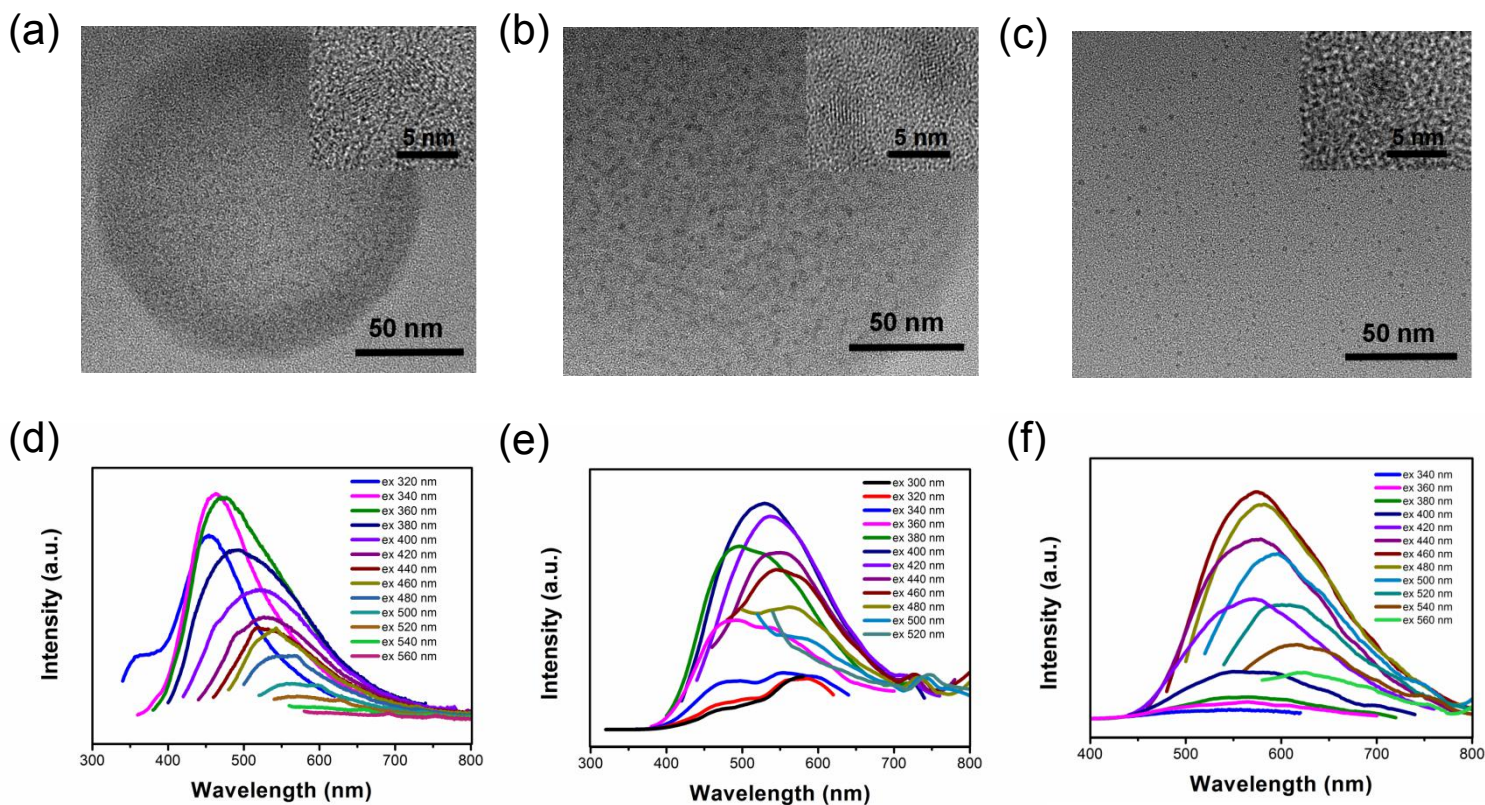

**Figure S1** HRTEM of CDs and FL spectra by other benzene series in catalytic-oxidation system: (a) and (d) benzene-CDs; (b) and (e) benzyl alcohol-CDs; (c) and (f) xylene-CDs.

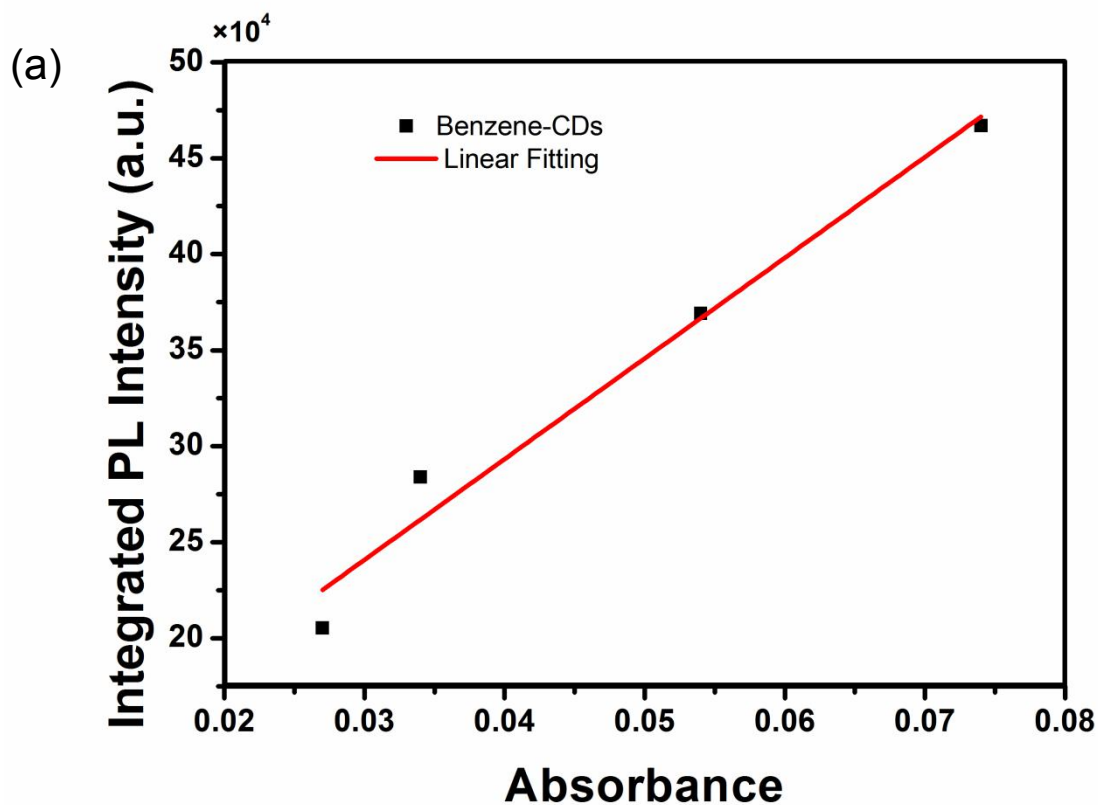

## Benzene-CDs

|               |                    |        |        |        |        |
|---------------|--------------------|--------|--------|--------|--------|
| Abs           | 0.074              | 0.054  | 0.06   | 0.034  | 0.027  |
| Integrated PL | 466904             | 369052 | 349934 | 283904 | 205433 |
| Slope         | $5.24 \times 10^6$ |        |        |        |        |
| QY            | 0.26 %             |        |        |        |        |

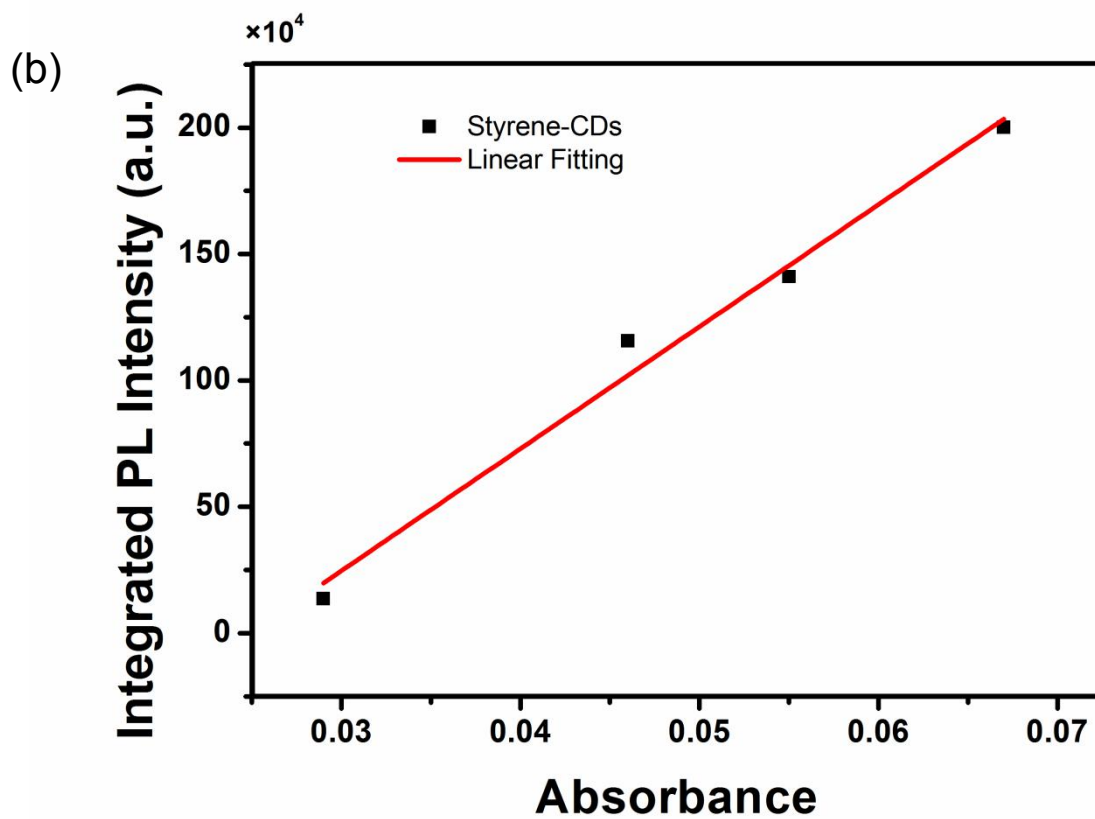

## Styrene-CDs

|               |                    |         |         |        |         |
|---------------|--------------------|---------|---------|--------|---------|
| Abs           | 0.067              | 0.059   | 0.055   | 0.029  | 0.046   |
| Integrated PL | 2002334            | 2044069 | 1410596 | 136974 | 1156289 |
| Slope         | $4.83 \times 10^7$ |         |         |        |         |
| QY            | 2.44 %             |         |         |        |         |

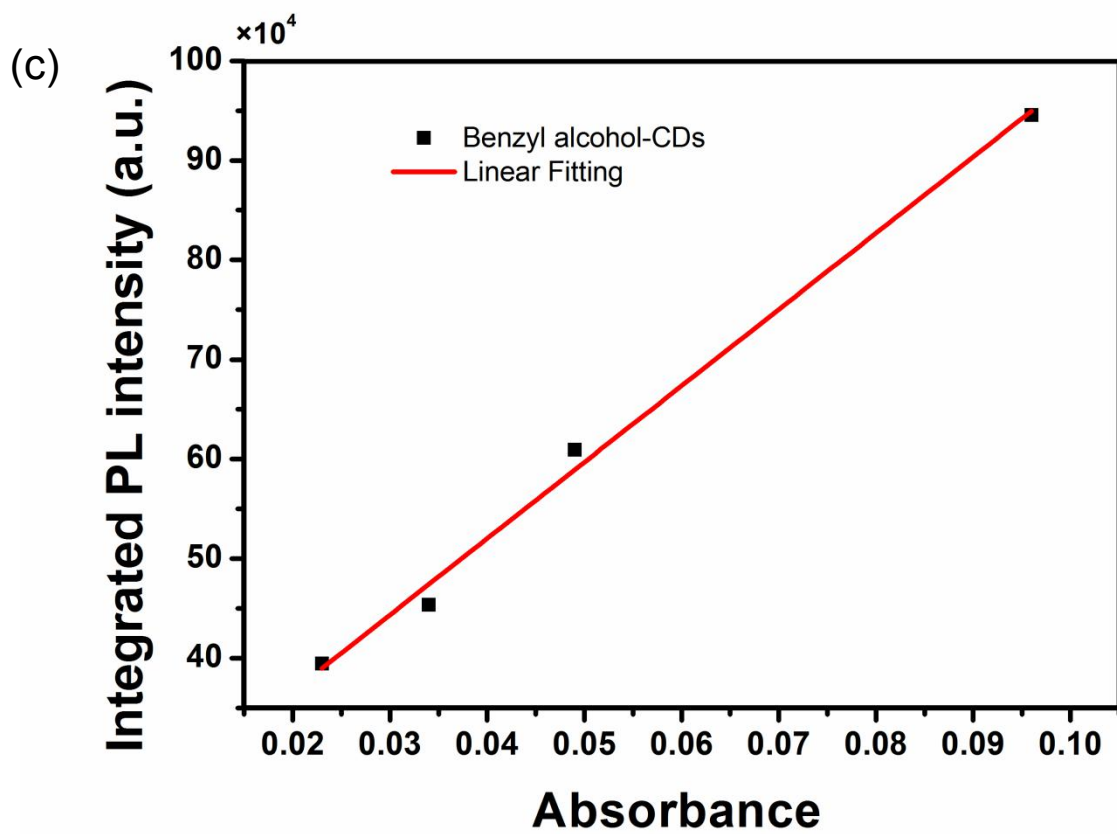

| Benzyl alcohol-CDs |                    |        |        |        |        |
|--------------------|--------------------|--------|--------|--------|--------|
| Abs                | 0.096              | 0.049  | 0.04   | 0.034  | 0.023  |
| Integrated PL      | 945562             | 609428 | 481736 | 453626 | 394438 |
| Slope              | $7.67 \times 10^6$ |        |        |        |        |
| QY                 | 0.39 %             |        |        |        |        |

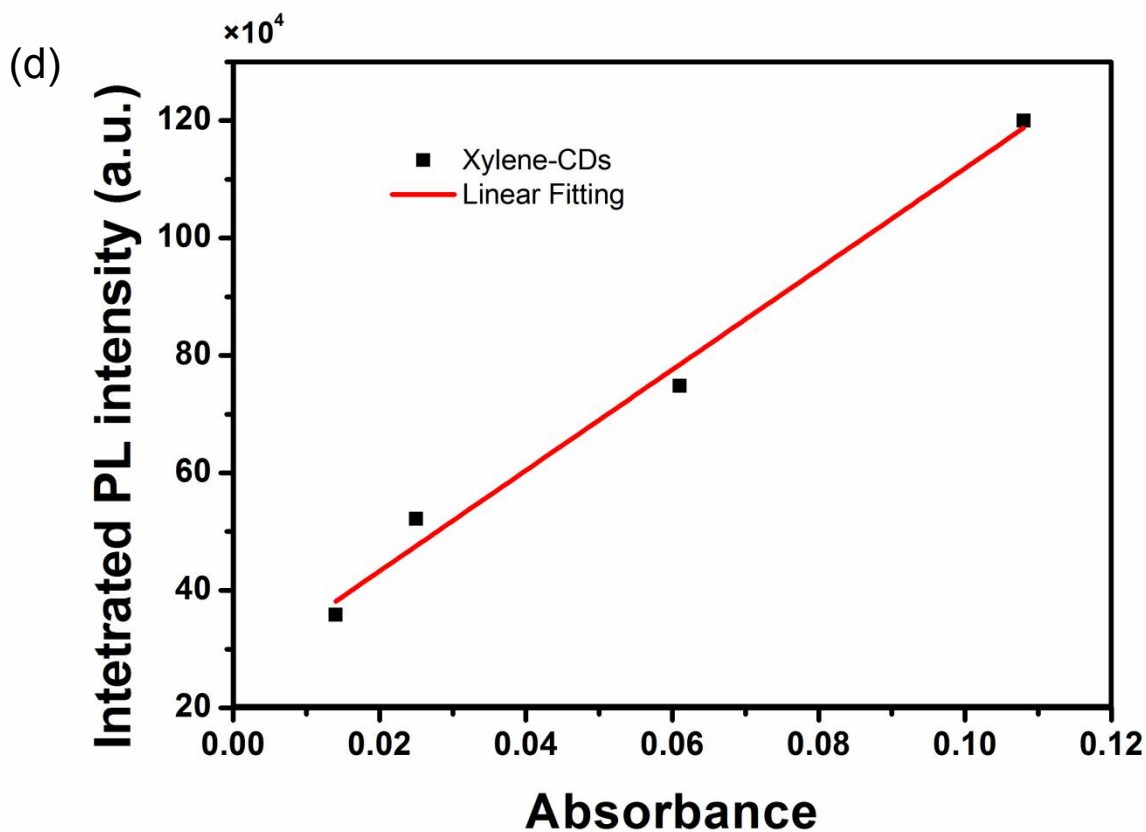

Xylene-CDs

|               |                    |        |        |        |        |
|---------------|--------------------|--------|--------|--------|--------|
| Abs           | 0.108              | 0.061  | 0.054  | 0.025  | 0.014  |
| Integrated PL | 1200206            | 747965 | 595171 | 522112 | 358388 |
| Slope         | $8.54 \times 10^6$ |        |        |        |        |
| QY            | 0.43 %             |        |        |        |        |

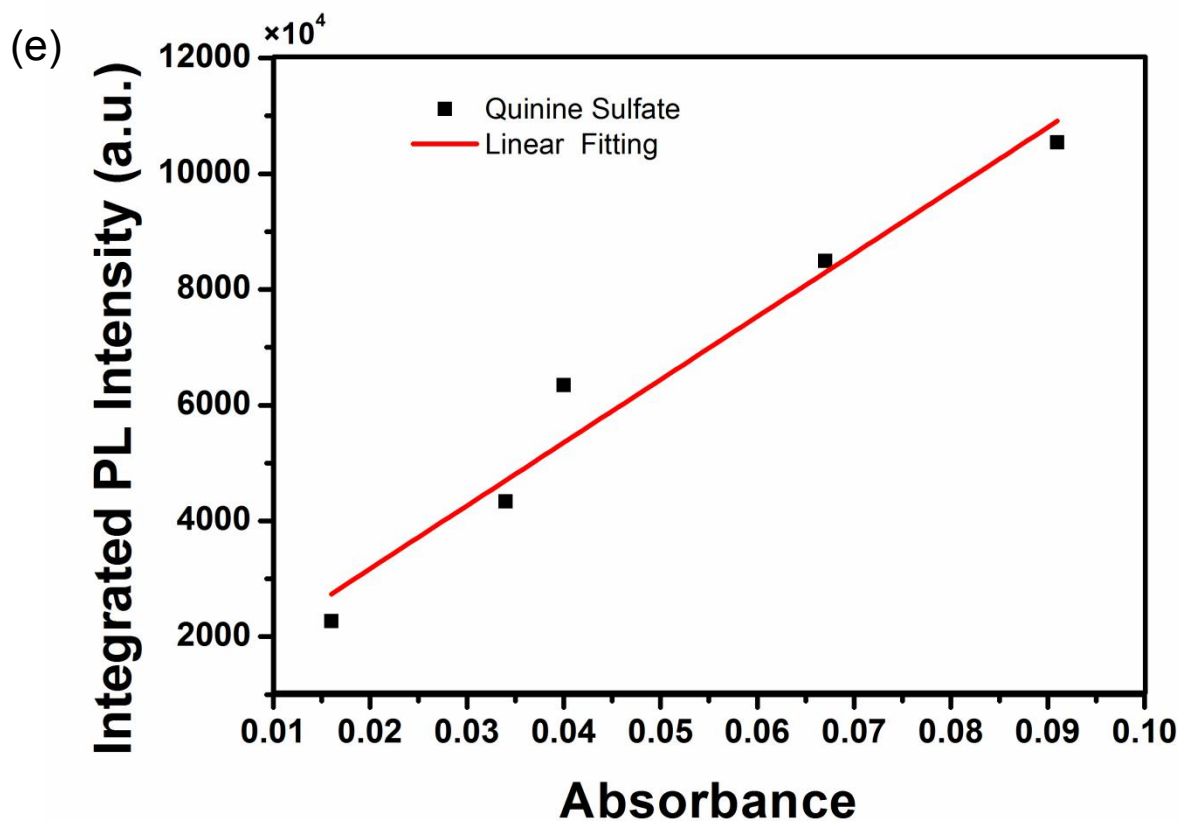

| Quinine Sulfate |          |          |                    |          |           |
|-----------------|----------|----------|--------------------|----------|-----------|
| Abs             | 0.016    | 0.034    | 0.04               | 0.067    | 0.091     |
| Integrated PL   | 22687777 | 43412639 | 63508730           | 84919367 | 105400219 |
| Slope           |          |          | $1.09 \times 10^9$ |          |           |
| QY              |          |          | 55 %               |          |           |

**Figure S2** Plots of integrated PL intensity of Benzene-CDs(a), Styrene-CDs(b), Benzyl alcohol-CDs(c), Xylene-CDs(d) and quinine sulfate(e) (referenced dye) as a function of optical absorbance at 365 nm and relevant data.

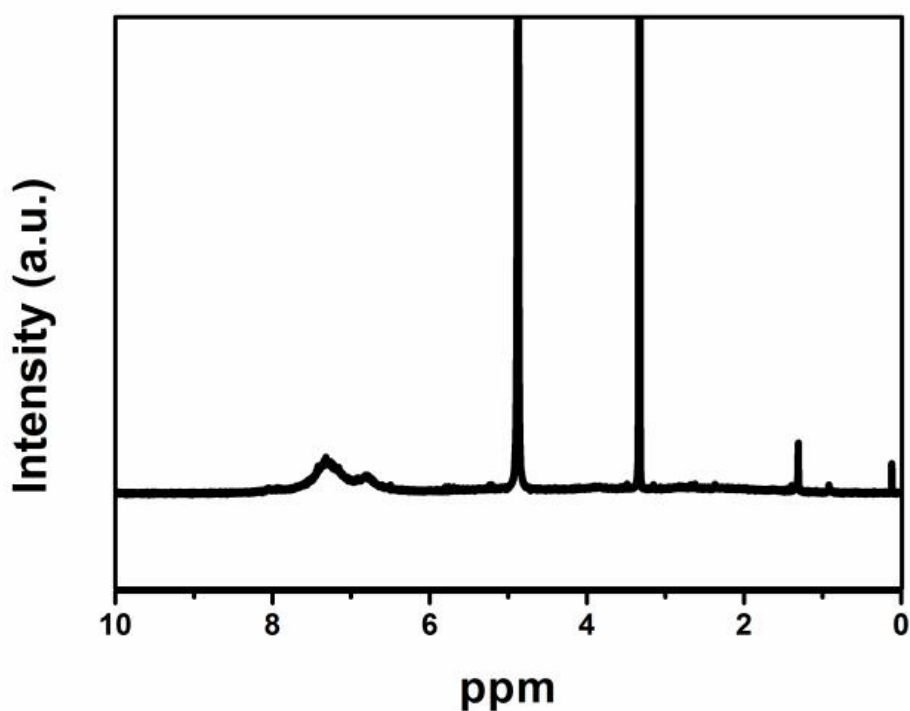

**Figure S3** <sup>1</sup>H NMR spectrum of CDs in methanol-d<sub>4</sub>. The intense peak at 3.34 and 4.87 ppm corresponds to the methanol-d<sub>4</sub> solvent residue and H<sub>2</sub>O. The signal at 0.8-2.0 ppm could be attributed to contaminants. The sample is prepared by styrene at concentration of 400 mM H<sub>2</sub>O<sub>2</sub> and 20 mM CuSO<sub>4</sub>.

**Table S1** Photoluminescent life time  $\tau$  of CDs samples(1,2,4,6,8) prepared by various oxidants concentration (100 mM, 200 mM, 400 mM, 600 mM, 800 mM H<sub>2</sub>O<sub>2</sub>, respectively).  $\chi^2$  is the reduced Chi-Square value for each  $\tau$  avg. PL peak excited at 368 nm.

| Sample | $\tau_1$ [ns] | B1(%) | $\tau_2$ [ns] | B2(%) | $\tau_{avg}$ [ns] | $\chi^2$ |
|--------|---------------|-------|---------------|-------|-------------------|----------|
| 1      | 2.22          | 100   | --            | --    | 2.22              | 1.08     |
| 2      | 2.25          | 100   | --            | --    | 2.25              | 1.02     |
| 4      | 2.43          | 100   | --            | --    | 2.43              | 1.07     |
| 6      | 3.48          | 27.6  | 0.769         | 72.4  | 2.50              | 1.00     |
| 8      | 2.86          | 29.1  | 0.415         | 70.9  | 2.23              | 1.00     |

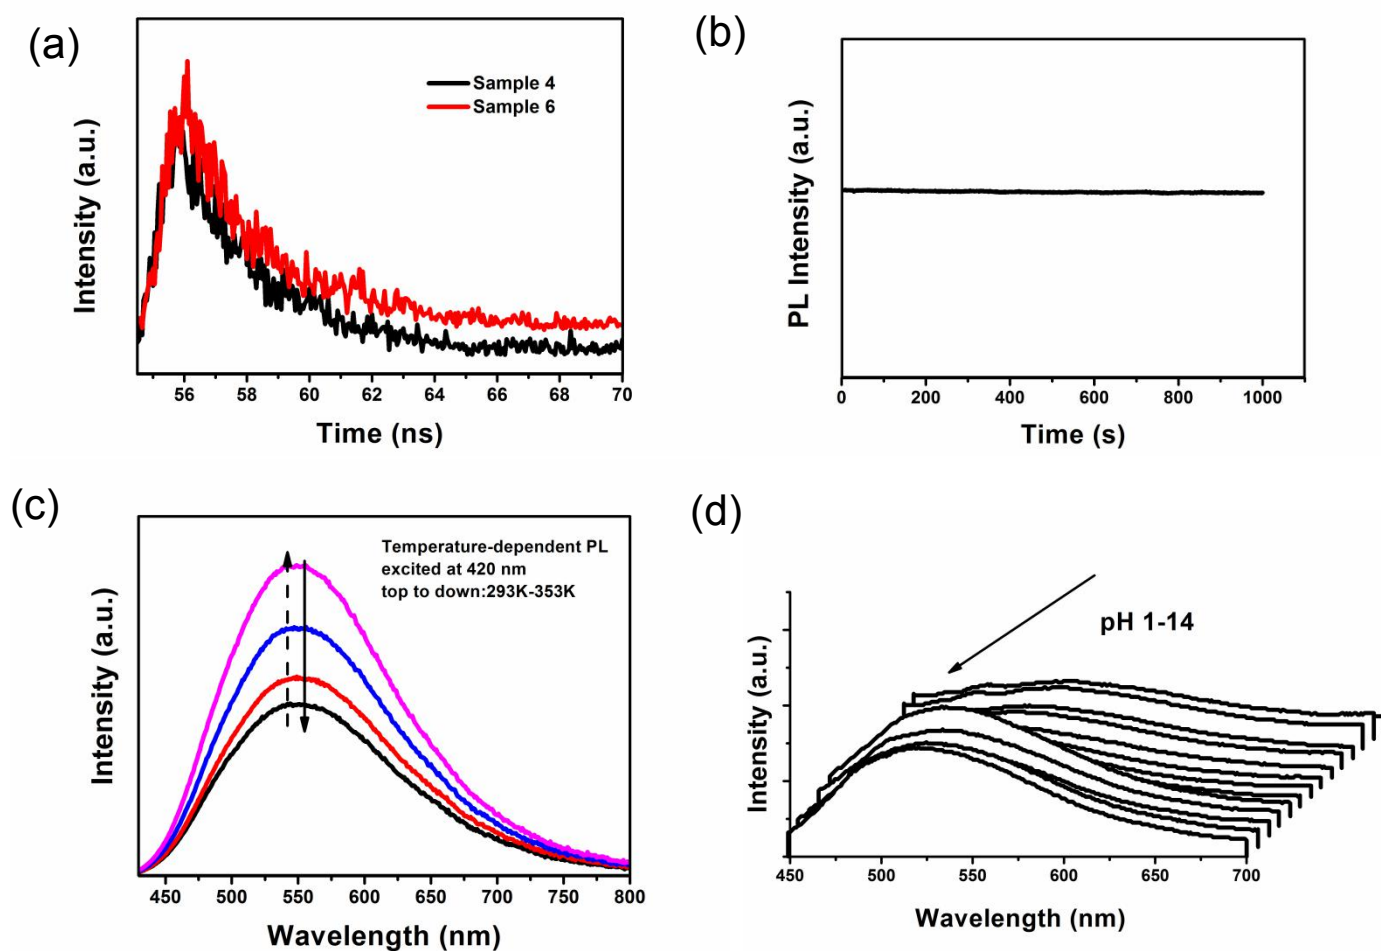

**Figure S4** Photoluminescence properties of CDs. a) Life time spectra at 368 nm excitation. b) Time-based PL spectra. c) Temperature-dependent PL spectrum of CDs-4 from 293-353K at 420 nm excitation. d) pH-dependent PL spectra of CDs-4.

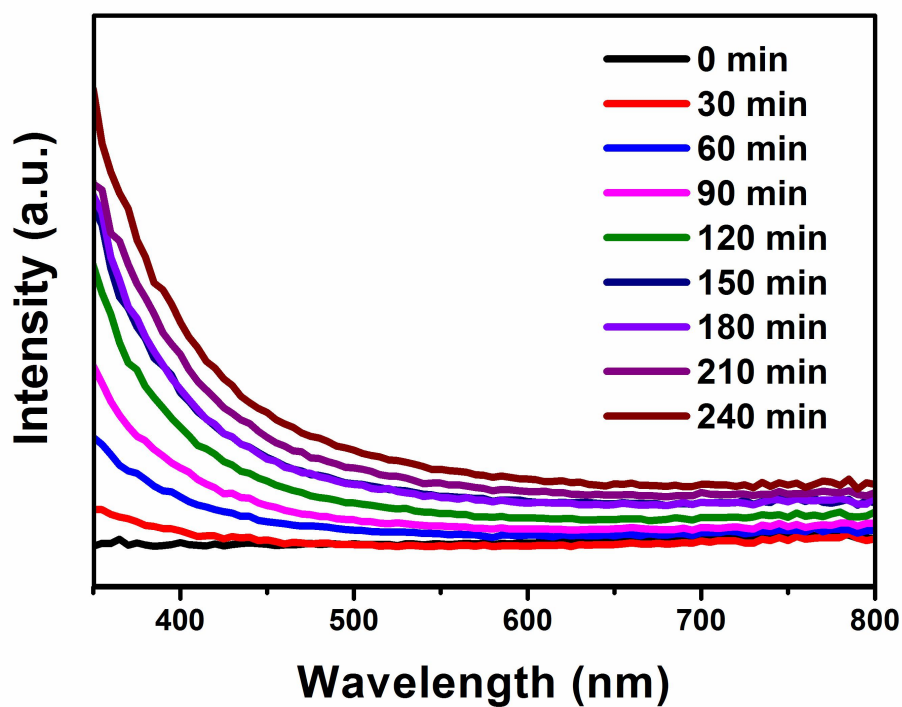

**Figure S5** UV/Vis and PL emission spectra of CDs versus various reaction time (a) and (d), concentration of  $\text{CuSO}_4$  (b) and (e); concentration of  $\text{H}_2\text{O}_2$  (c) and (f). Emission wavelength: PL peak excited at 420 nm.

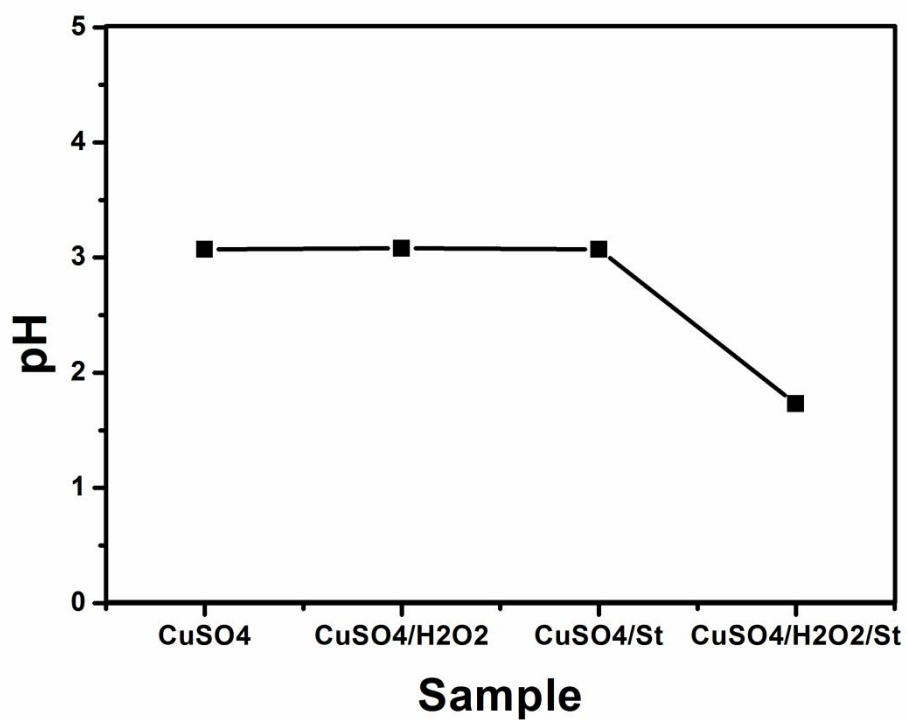

**Figure S6** PH variation of different systems.



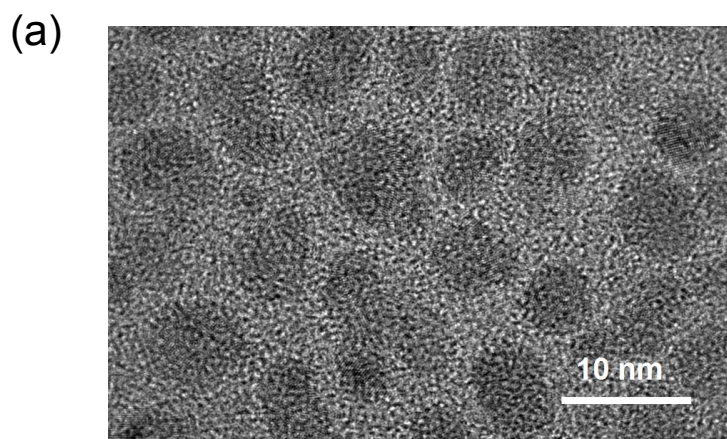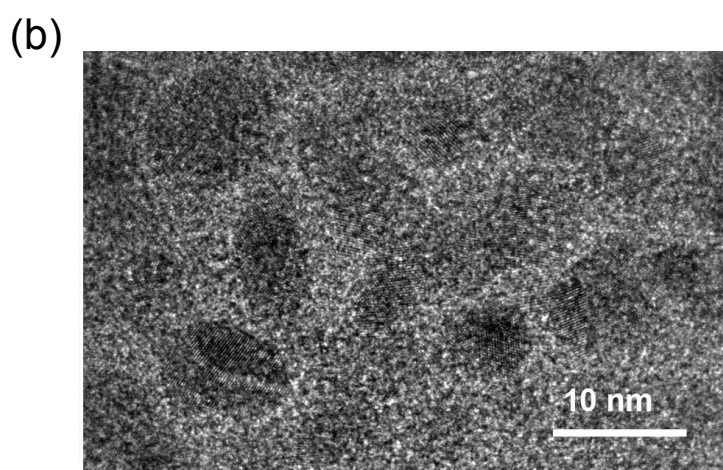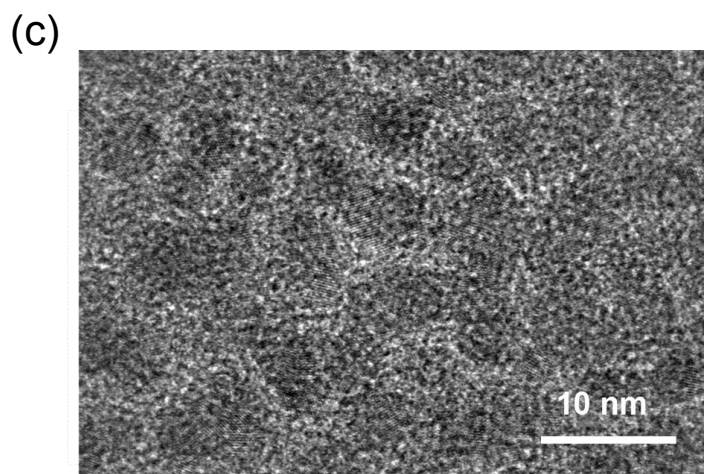

**Figure S7** HRTEM of carbon dots by some water soluble molecules in catalytic-oxidation system: (a) citric acid-CDs; (b) ascorbic acid-CDs; (c) ethylene glycol-CDs.

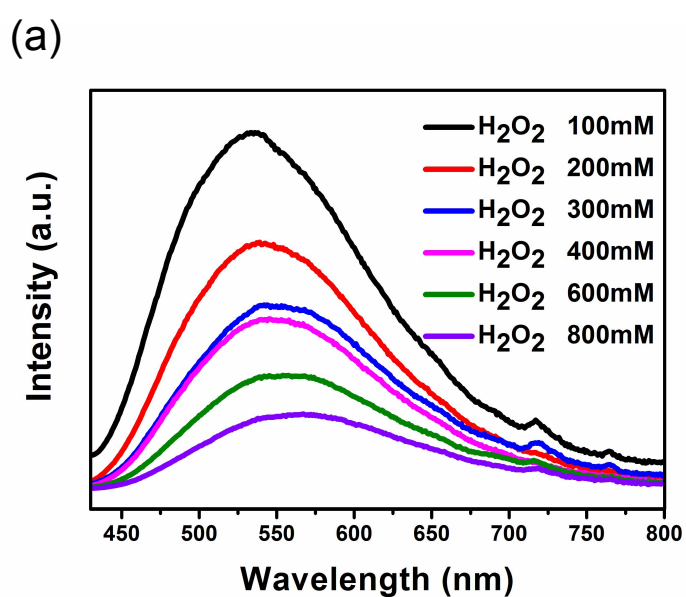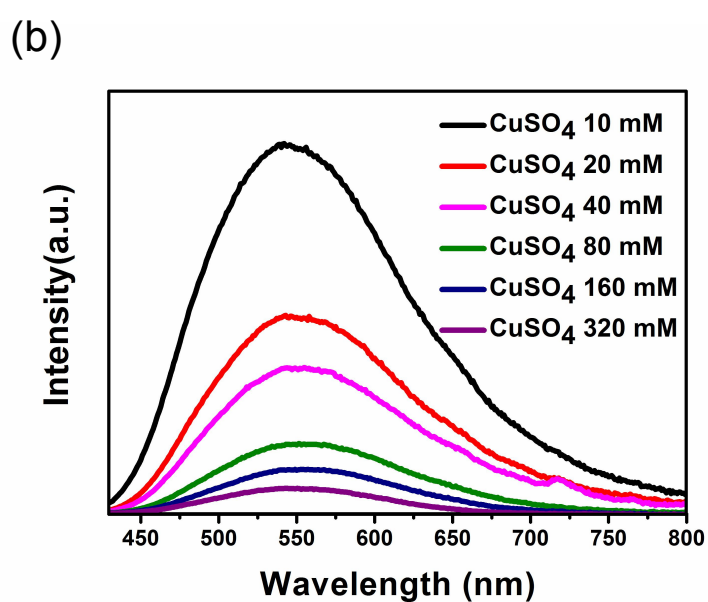

**Figure S8** PL emission spectra of CDs versus various concentration of  $\text{CuSO}_4$  (a); concentration of  $\text{H}_2\text{O}_2$  (b). Emission wavelength: PL peak excited at 420 nm.

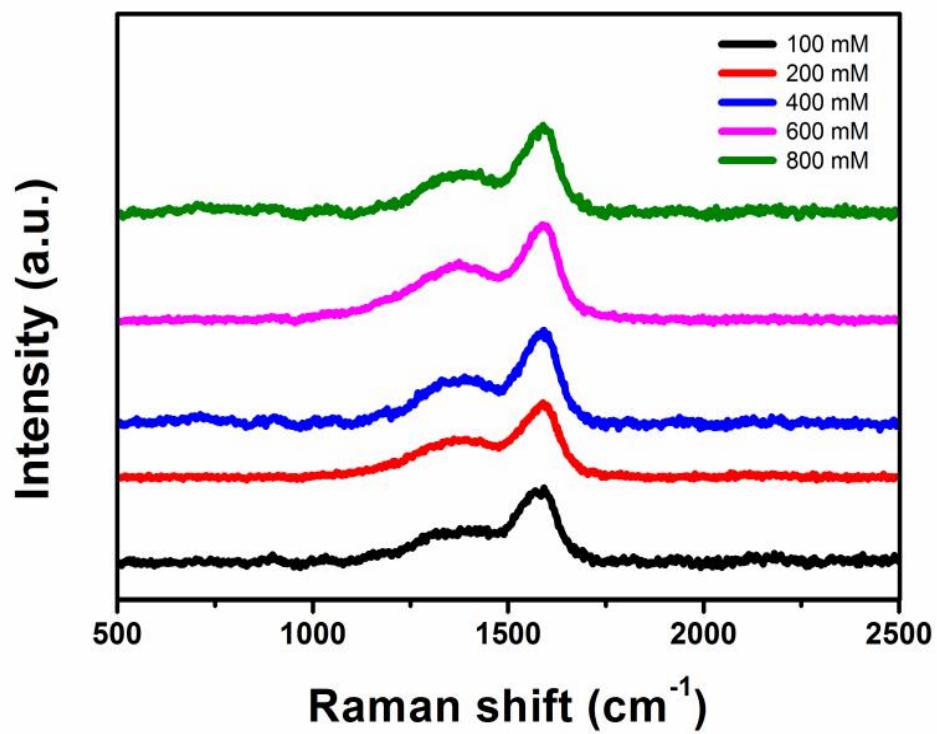

**Figure S9** Raman spectra of CDs versus various concentration of H<sub>2</sub>O<sub>2</sub>.

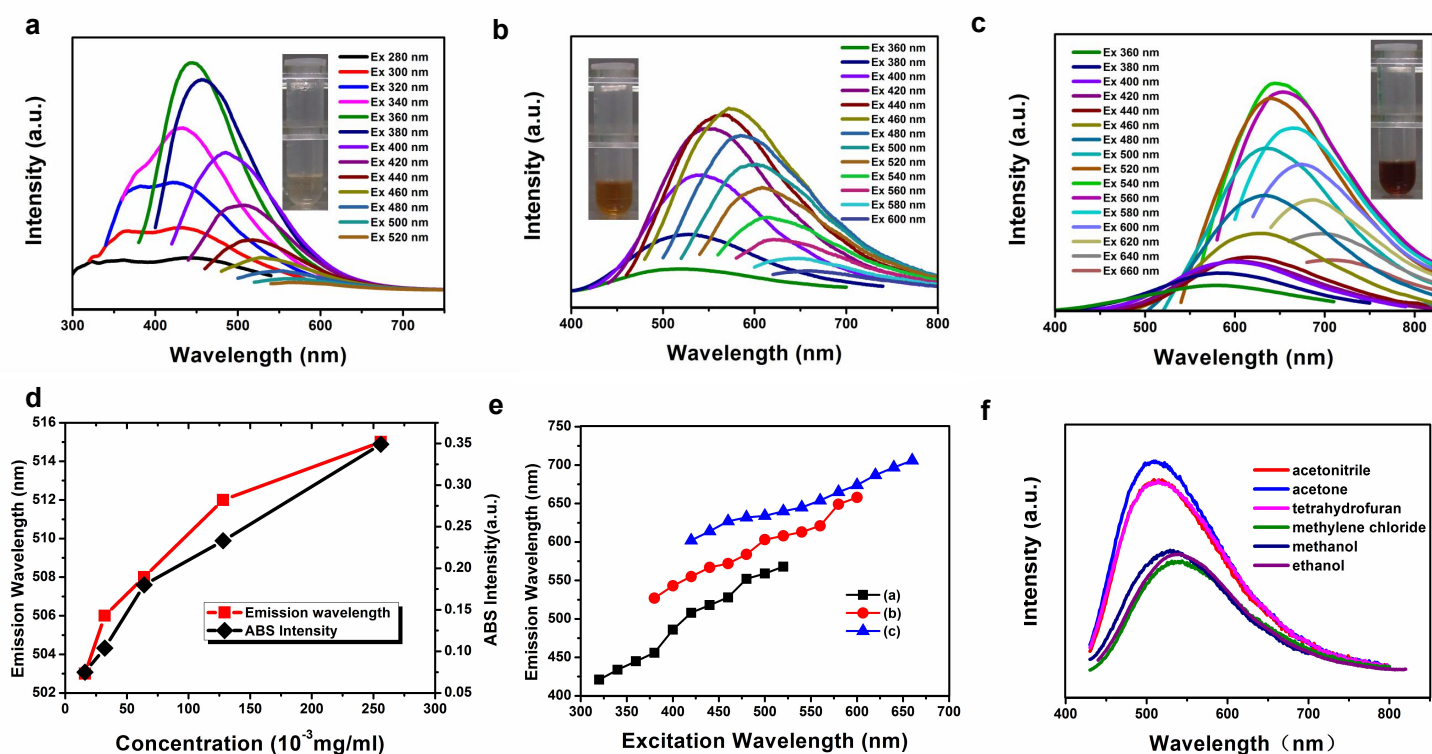

**Figure S10** PL emission spectra of CDs versus various concentration in ethanol solution. (a) 0.064 mg/ml, (b) 0.256 mg/ml, (c) 1.024 mg/ml, (d) PL emission wavelength maxima (Ex=420 nm) and absorption intensity versus different concentration of carbon dots in ethanol solution, (e) PL emission wavelength maxima versus excitation wavelength of the samples at concentration(a),(b),(c). (f) PL emission spectra of CDs dispersed in different polar solvents.

(a)

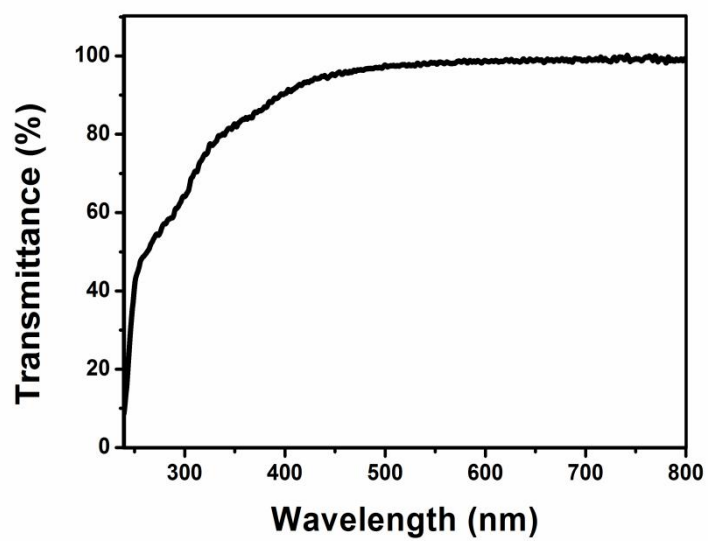

(b)

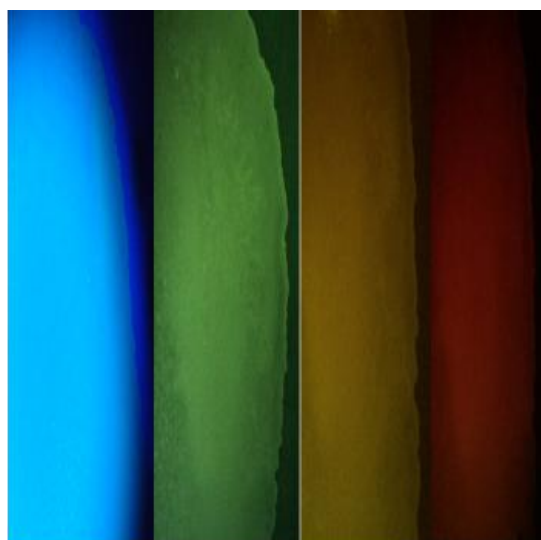

**Figure S11** Large area coatings (1.33% CDs) 30 ml on the 50 \* 32 cm PET films under UV light. (a) The transmittance curves of the coating films. (b) The fluorescence microscopy images (green, yellow, red) were obtained through band-pass filters of different wavelengths: 500 nm, 550 nm, and 600 nm.
